# Supplementary material for: Nail structural alterations and zinc levels in the elderly: an observational cross-sectional study
Source: PeerJ. 2026 Feb 3;14:e20771. doi: 10.7717/peerj.20771 (PMC12880089; doi:10.7717/peerj.20771)
Supplement: Supplemental Information 1 [file peerj-14-20771-s001.xlsx]

## Sheet: Data
id	group	sex	age	age_group	occupation	ht	dm	dyslipidemia	antiht	antidm	antidyslipidemia	anticonvulsant	anymedication	nailzinc	consumedmedication
1	1	0	66	0	3	0	0	1	0	0	1	0	1	500.3	Atorvastatin
2	1	1	84	2	1	0	0	0	0	0	0	0	1	106.6	canterin, avodart, alovell, vit D3
3	1	0	83	2	1	0	0	0	0	0	0	0	1	126.74	pariet, albumin, planix, samsca, actonel
4	1	0	64	0	0	0	1	0	0	0	0	0	0	117.34
5	1	0	65	0	0	1	0	0	0	0	0	0	0	208.65
6	1	0	70	1	0	0	1	0	1	1	1	0	1	157.34	Atorvastatin, miniaspi, amlodipin, candesartan, bisoprolol, allopurinol, novorapid, metformin, ryzodeg
7	1	0	73	1	0	0	1	0	1	1	0	1	1	129.42	glimepirid, simvastatin, candesartan, adalatoros, gabapentin, NAC
8	1	1	66	0	1	0	1	0	1	1	0	0	1	103.94	Bicnat, adalatoros, lantus, clopidogrel, aspilet, bisoprolol, atorvastatin, galvus
9	1	1	60	0	1	1	0	0	0	0	0	0	1	88.02	Afatinib
10	1	1	67	0	3	1	1	0	1	1	1	0	1	383.66	metformin, amlodipin, candesartan, atorvastatin, clopidogrel, glibenklamid, fenofibrat
11	1	1	79	1	0	1	0	0	1	0	0	0	1	79.93	adalat, candesartan, clopidogrel, avodart, tamsulosin, fish oil
12	1	0	67	0	0	1	0	0	1	0	0	0	1	113.68	bisoprolol, candesartan, Na diklofenak
13	1	1	74	1	3	1	1	1	1	1	1	0	1	98.9	glikuidon, aspilet, atorvastatin, bicnat, adalat oros, bisoprolo, furosemide, vidagliptin, kalitake
14	1	0	68	0	3	0	1	0	0	1	1	0	1	154.52	Metformin, glimepirid, simvastatin
15	1	0	62	0	0	0	0	1	0	0	0	0	1	105.7	siklosporin
16	1	1	73	1	0	1	0	0	1	0	0	0	1	87.6	candesartan, bisoprolol, Na diklofenak, DAA sofosbuvir, daklatasvir
17	1	1	61	0	0	1	1	1	0	1	0	1	1	98.28	inj secukinumab, cetirizine, paracetamol, glimepirid, gabapentin, simvastatin
18	1	1	74	1	3	1	0	0	1	1	0	1	1	133.89	gabapentin, amlodipin, allopurinol, bisoprolol, candesartan
19	1	0	70	1	0	1	1	0	1	1	0	0	1	192.22	metformin, glibenklamid, amlodipin, candesartan, bisoprolol, aspirin
20	1	1	78	1	3	0	0	0	0	0	0	0	1	118.16	hydrea, aspilet, folic acid, allopurinol, lansoprazole, vit B12
21	1	0	64	0	0	0	0	0	0	0	0	0	1	131.2	vit B6, B12, D3, magnesium
22	1	0	61	0	0	0	0	0	0	0	0	0	1	123.33	sulfasalazine, prednisone, myfortic, folic acid, actonel, cetirizin, gabapentin, CaCO3, amitrptilin, ibuprofen, vit B6, vit B12
23	1	1	70	1	2	1	0	0	1	1	1	0	1	87.13	furosemide, candesartan, clopdogrel, atorvastatin, allopurinol
24	1	0	60	0	0	0	0	1	0	0	1	1	1	125.19	atorvastatin, gabapentin, vit B6, B12, Na diklofenak
25	1	0	65	0	3	1	0	1	1	0	0	0	1	124.54	euthyrox, CaCO3, captopril, simvastatin, vit B complex
26	1	0	77	1	0	1	0	0	0	0	0	0	1	128.11	paracetamol, solifenacin succinate
27	1	0	67	0	0	1	0	0	1	0	0	0	1	124.97	ramipril, amlodipin
28	1	1	69	0	3	0	0	0	0	0	0	0	0	109.56
29	1	0	63	0	0	0	1	0	0	1	0	0	1	150.07	glimepirid
30	1	1	64	0	0	0	1	0	0	1	0	0	1	99.5	metformin, insulin
31	1	1	84	2	3	0	1	0	1	1	1	0	1	108.72	Amlodipin, bisoprolol, aspilet, atorvastatin, ramipril, nitrokaf, clopidogrel
32	1	0	67	0	3	1	0	0	1	0	1	0	1	110.39	ascardia, simvastatin, amlodipin, ramipril
33	0	1	61	0	0	0	1	0	1	1	1	1	1	113.32	metformin, miniaspilet, lansprazole, atorvastatin, bioprolol, nitrokaf
34	0	0	64	0	3	1	0	0	1	0	0	0	1	102.29	amlodipin
35	0	1	61	0	3	0	0	0	0	0	1	1	1	93.27	atorvastatin, vit D3, kalsium, gabapentin
36	0	0	61	0	2	1	0	0	1	0	0	0	1	110.91	amlodipin
37	0	0	70	1	0	0	1	1	0	1	1	0	1	116.94	metformin, simvastatin
38	0	0	73	1	1	1	1	0	1	1	1	1	1	120.34	amlodipin, candesartan, novorapid, lantus, atorvastatin, gabapentin
39	0	1	64	0	1	0	0	0	0	0	0	0	1	79.92	metrotreksat, as folat
40	0	0	65	0	0	1	1	0	1	1	1	1	1	112.36	metformin, amlodipin, bisoprolo, candesartan, atorvastatin, allopurinol, gabapentin, vit B12
41	0	0	61	0	0	0	0	1	0	0	0	0	1	113.77	sulfasalazine, CaCO3, PCT, simvastatin, lansoprazole, vit D
42	0	1	70	1	1	1	1	1	1	0	1	0	1	103.33	miniaspi, ISDN, simvastatin, valsartan
43	0	0	66	0	0	0	1	1	0	1	1	1	1	202.8	metformin, atorvastatin, CaCO3, gabapentin, kolkatriol osteonal, vitamin B12
44	0	1	75	1	3	0	0	0	0	0	0	0	0	98.17
45	0	1	66	0	2	1	1	1	1	1	1	0	1	156.45	amlodipin, simvastatin, metformin, clopidogrel
46	0	1	78	1	0	1	0	1	0	0	1	0	1	146.49	asetilsalisilik acid, atorvastatin
47	0	1	64	0	2	0	0	0	0	0	0	0	0	150.52
48	0	0	68	0	3	1	1	1	1	1	1	1	1	153.91	adalat oros, allopurinol, glikuidon, candesartan, atorvastatin, kolkisin, PCT, lansoprazole, gabapentin
49	0	1	62	0	1	1	1	0	0	0	0	0	1	115.02	loratadine
50	0	1	69	0	1	1	1	0	0	0	0	1	1	158.36	trihexypenidil, leparson, sifrol, vit B12, aricept
51	0	1	69	0	1	0	0	1	0	0	1	0	1	100.33	quetiapine, pletaal, as. Folat, simvastatin, donepezil, abixa, omega 3
52	0	0	70	1	0	0	0	0	0	0	0	0	0	164.24
53	0	1	62	0	3	1	1	0	1	1	0	0	1	121.7	apidra, lantus, kandesartan
54	0	1	68	0	0	0	1	1	0	1	1	1	1	104.5	atorvastatin, furosemid, metformin, sukralfat, omeprazole, sprionolakton, propanolol, allopurinol, vit D
55	0	0	66	0	0	0	0	1	0	0	1	0	1	114.52	simvastatin
56	0	0	77	1	0	1	1	0	0	1	0	0	1	125.05	quetiapine, metformin, glikuidon, galvus
57	0	1	64	0	1	0	1	0	1	0	1	0	1	113.16	Bisoprolol, atorvastatin, aspilet, vitamin D1000 IU
58	0	1	66	0	0	0	0	0	0	0	0	0	0	145.2
59	0	1	70	1	0	1	0	1	1	0	1	0	1	123.86	crestor, ezetrol, avodart, coveram
60	0	0	60	0	0	0	0	0	0	0	0	0	0	154.33
61	0	1	70	1	0	0	0	0	0	0	0	0	0	117.92
62	0	0	61	0	1	0	0	0	0	0	0	0	0	148.87
63	0	0	67	0	0	0	0	0	0	0	0	0	0	133.09
64	0	0	72	1	0	1	0	0	1	0	1	0	1	142.7	amlodipine, atorvastatin, vit D1000
value	group	sex	age_group	occupation	ht	dm	dislipidemia	antiht	antidm	antidislipidemia	anticonvulsant	anymedication
0	Control	Female	60s	Housewife or unemployed	No	No	No	No	No	No	No	No
1	Case	Male	70s	Entrepreneur	Yes	Yes	Yes	Yes	Yes	Yes	Yes	Yes
2			80 or more	Laborer
3				Employee
